# Supplementary material for: Energy and nutrient intakes in relation to National Nutrition Recommendations in a Norwegian population-based sample: the Tromsø Study 2015–16
Source: PubMed Central journal article supplement (PMC7007761; doi:10.29219/fnr.v63.3616), 2019-12-10
Supplement: FNR-63-3616-s001.pdf [file FNR-63-3616-s001.pdf]

718 **Supplementary table 1:** Age and sex of attenders and non-attenders of Tromsø 7.

719

|                               | <b>Non-attenders</b> | <b>Attenders (included in final analysis)</b> | <b>P-value</b> |
|-------------------------------|----------------------|-----------------------------------------------|----------------|
| <b>N</b>                      | 11,508               | 11,425                                        |                |
| <b>Mean age (years)</b>       | 57.6 (14.1)          | 57.5 (10.8)                                   | >0.5           |
| <b>Mean age women (years)</b> | 59.8 (15.2)          | 56.9 (10.7)                                   | <0.001         |
| <b>Mean age men (years)</b>   | 55.6 (12.7)          | 58.1 (11.0)                                   | <0.001         |
| <b>% women (N)</b>            | 47.5 (5465)          | 53.4 (6104)                                   | <0.001         |

720 Results are given as mean (standard deviation) or as percentage (number).

721

722

723

724

725

726

727

728

729

730

731

732

733

734

735

736

737

738

739

740

741

742 **Supplementary table 2:** Selected characteristics of all attenders of Tromsø 7 and those included in the final study sample (after exclusion). The  
 743 Tromsø Study 2015-16.

744

|                                             | Attended Tromsø 7        |                          | P-value: | Completed FFQ            |                          | P-value: |
|---------------------------------------------|--------------------------|--------------------------|----------|--------------------------|--------------------------|----------|
|                                             | Excluded in final sample | Included in final sample |          | Excluded in final sample | Included in final sample |          |
| <b>N</b>                                    | <b>9658</b>              | <b>11,425</b>            |          | <b>3721</b>              | <b>11,425</b>            |          |
| <b>Mean age (years (SD))</b>                | 57.1 (12.1)              | 57.5 (10.8)              | 0.04     | 62.5 (11.9)              | 57.5 (10.8)              | <0.001   |
| <b>Women (% (N))</b>                        | 51.5 (4970)              | 53.4 (6104)              | 0.004    | 55.3 (2056)              | 53.4 (6104)              | 0.05     |
| <b>Education level (% (N))</b>              |                          |                          |          |                          |                          |          |
| - Primary                                   | 26.3 (2469)              | 20.6 (2327)              | <0.001   | 33.6 (1207)              | 20.6 (2327)              | <0.001   |
| - Secondary                                 | 28.6 (2692)              | 27.1 (3064)              |          | 27.8 (997)               | 27.1 (3064)              |          |
| - Tertiary (short: <4 years)                | 17.9 (1687)              | 20.5 (2321)              |          | 15.6 (560)               | 20.6 (2322)              |          |
| - Tertiary (long: ≥4 years)                 | 27.2 (2555)              | 31.8 (3590)              |          | 23.0 (825)               | 31.8 (3589)              |          |
| <b>Body mass index (mean (SD))</b>          | 27.5 (4.63)              | 27.2 (4.47)              | <0.001   | 27.4 (0.08)              | 27.2 (4.47)              | 0.03     |
| <b>Subjective memory complaints (% (N))</b> |                          |                          |          |                          |                          |          |
| - Yes                                       | 44.0 (4123)              | 43.7 (4947)              | 0.71     | 49.0 (1775)              | 43.7 (4947)              | <0.001   |
| - No                                        | 56.0 (5252)              | 56.3 (6369)              |          | 51.0 (1845)              | 56.3 (6369)              |          |
| <b>Current smoker (% (N)):</b>              |                          |                          |          |                          |                          |          |
| - Yes                                       | 15.5 (1475)              | 12.6 (1429)              | <0.001   | 12.7 (464)               | 12.6 (1429)              | 0.9      |

745 \*FFQ: food frequency questionnaire; SD: standard deviation; N: number.

746

747

748

749

750

751

752

753

754

755

756

757 **Supplementary table 3:** Energy and nutrient intakes by sex and 10-year age groups. The Tromsø Study 2015-16.

|              | <b>N*</b>   | <b>Energy, MJ/d</b> | <b>Protein, E%</b> | <b>Fat, E%</b>   | <b>Saturated fat, E%</b> | <b>Trans-fat, E%</b> | <b>Monounsatur. fat, E%</b> |
|--------------|-------------|---------------------|--------------------|------------------|--------------------------|----------------------|-----------------------------|
| <b>RI*</b>   |             |                     | <b>10-20</b>       | <b>25-40</b>     | <b>&lt;10</b>            | <b>&lt;1</b>         | <b>10-20</b>                |
| <b>Total</b> | 11,425      | 9.72 (9.67–9.78)    | 17.6 (17.6-17.7)   | 34.5 (34.3-34.6) | 12.5 (12.5-12.6)         | 0.31 (0.30-0.31)     | 12.8 (12.7-12.8)            |
| <b>Women</b> | 53.4 (6104) | 8.92 (8.85–8.98)    | 17.8 (17.7-17.9)   | 34.8 (34.6–34.9) | 12.6 (12.6-12.7)         | 0.32 (0.32-0.32)     | 13.0 (13.0-13.0)            |
| 40-49        | 30.0 (1833) | 9.40 (9.23-9.48)    | 17.4 (17.2-17.5)   | 35.5 (35.2-36.0) | 13.0 (12.8-13.1)         | 0.32 (0.31-0.32)     | 13.4 (13.3-13.5)            |
| 50-59        | 29.7 (1813) | 9.00 (8.88-9.13)    | 18.0 (17.9-18.1)   | 34.7 (34.5-35.0) | 12.4 (12.2-12.5)         | 0.32 (0.31-0.32)     | 13.1 (13.0-13.2)            |
| 60-69        | 27.0 (1646) | 8.63 (8.50-8.75)    | 18.1 (18.0-18.2)   | 34.6 (34.3-34.9) | 12.5 (12.3-12.6)         | 0.32 (0.31-0.32)     | 12.8 (12.7-13.0)            |
| 70-79        | 11.1 (679)  | 8.35 (8.14-8.55)    | 18.0 (17.8-18.1)   | 33.6 (33.2-34.0) | 12.8 (12.6-13.0)         | 0.33 (0.32-0.34)     | 11.9 (11.7-12.1)            |
| 80+          | 2.2 (133)   | 8.16 (7.69-8.64)    | 17.1 (16.6-17.5)   | 33.4 (32.5-34.4) | 13.2 (12.7-13.7)         | 0.35 (0.32-0.37)     | 11.6 (11.2-11.9)            |
| <b>Men</b>   | 46.6 (5321) | 10.7 (10.6–10.7)    | 17.4 (17.3-17.4)   | 34.1 (33.9-34.2) | 12.4 (12.3-12.5)         | 0.29 (0.29-0.29)     | 12.6 (12.5-12.7)            |
| 40-49        | 26.9 (1433) | 11.4 (11.2-11.6)    | 17.0 (16.8-17.1)   | 34.9 (34.6-35.2) | 12.8 (12.6-12.9)         | 0.30 (0.30-0.31)     | 13.1 (12.9-13.2)            |
| 50-59        | 27.5 (1464) | 11.0 (10.8-11.1)    | 17.5 (17.3-17.6)   | 34.4 (34.1-34.6) | 12.3 (12.2-12.4)         | 0.29 (0.28-0.30)     | 12.9 (12.7-13.0)            |
| 60-69        | 28.6 (1521) | 10.3 (10.1-10.4)    | 17.6 (17.5-17.7)   | 33.6 (33.4-33.9) | 12.1 (12.0-12.3)         | 0.29 (0.28-0.29)     | 12.3 (12.2-12.5)            |
| 70-79        | 14.4 (768)  | 9.62 (9.42-9.81)    | 17.6 (17.4-17.7)   | 33.0 (32.6-33.4) | 12.3 (12.1-12.5)         | 0.29 (0.28-0.30)     | 11.8 (11.6-12.0)            |
| 80+          | 2.54 (135)  | 9.41 (8.95-9.86)    | 17.1 (16.7-17.4)   | 33.5 (32.7-34.4) | 13.3 (12.8-13.8)         | 0.34 (0.31-0.36)     | 11.6 (11.3-12.0)            |

758 \* Total is presented as number, sex- and age-specific numbers are presented as percentage (number)

759 \* Numbers for total energy are presented as MJ/day with 95% confidence intervals.

760 \* Numbers for macronutrients (with the exception of fiber, which is presented as g/day) are presented as energy percentage (E%) with 95% confidence intervals.

761 \* Recommended intakes (RI) are presented as they are given in the Nordic Nutrition Recommendations 2012.

762

763

764

765

766

767

768

769

770

771

772 **Cont. Supplementary table 3:** Energy and nutrient intake by sex and 10-year age groups. The Tromsø Study 2015-16

|              | <b>Polyunsat. fat, E%</b> | <b>Omega 3, E%</b> | <b>Carbohydrates, E%</b> | <b>Fiber, g/day</b>                  | <b>Added sugar, E%</b> | <b>Alcohol, E%</b> |
|--------------|---------------------------|--------------------|--------------------------|--------------------------------------|------------------------|--------------------|
| <b>RI</b>    | <b>5-10</b>               | <b>≥1</b>          | <b>45-60</b>             | <b>Women: &gt;25<br/>Men: &gt;35</b> | <b>&lt;10</b>          | <b>&lt;5</b>       |
| <b>Total</b> | 6.04 (6.01-6.07)          | 1.49 (1.48-1.50)   | 42.2 (42.1-42.3)         | 28.4 (28.2-28.6)                     | 5.56 (5.50-5.63)       | 3.38 (3.31-3.45)   |
| <b>Women</b> | 6.01 (5.97-6.05)          | 1.49 (1.49-1.50)   | 42.0 (41.8-42.1)         | 28.4 (28.1-28.6)                     | 5.45 (5.37-5.54)       | 2.87 (2.79-2.96)   |
| 40-49        | 6.00 (5.93-6.08)          | 1.35 (1.32-1.37)   | 42.3 (42.0-42.5)         | 28.1 (27.6-28.6)                     | 5.96 (5.77-6.14)       | 2.46 (2.32-2.59)   |
| 50-59        | 6.09 (6.02-6.16)          | 1.49 (1.47-1.52)   | 41.4 (41.1-41.7)         | 29.4 (29.0-29.9)                     | 5.16 (5.01-5.31)       | 3.17 (3.01-3.33)   |
| 60-69        | 6.09 (6.02-6.17)          | 1.57 (1.54-1.60)   | 41.4 (41.0-41.7)         | 28.5 (28.0-28.9)                     | 5.08 (4.94-5.23)       | 3.26 (3.08-3.44)   |
| 70-79        | 5.69 (5.58-5.80)          | 1.60 (1.56-1.65)   | 43.4 (43.0-43.9)         | 26.8 (26.1-27.5)                     | 5.65 (5.40-5.90)       | 2.44 (2.21-2.66)   |
| 80+          | 5.51 (5.28-5.75)          | 1.65 (1.56-1.75)   | 45.1 (44.1-46.1)         | 25.2 (23.7-26.6)                     | 6.14 (5.55-6.73)       | 1.87 (1.26-2.48)   |
| <b>Men</b>   | 6.07 (6.03-6.12)          | 1.49 (1.48-1.51)   | 42.4 (42.2-42.6)         | 28.5 (28.2-28.7)                     | 5.68 (5.59-5.78)       | 3.96 (3.84-4.07)   |
| 40-49        | 6.09 (6.01-6.17)          | 1.37 (1.34-1.39)   | 42.8 (42.5-43.1)         | 28.8 (28.3-29.3)                     | 6.06 (5.86-6.26)       | 3.24 (3.05-3.42)   |
| 50-59        | 6.15 (6.07-6.23)          | 1.46 (1.44-1.49)   | 41.9 (41.6-42.2)         | 29.3 (28.7-29.8)                     | 5.36 (5.18-5.54)       | 4.13 (3.91-4.34)   |
| 60-69        | 6.13 (6.05-6.22)          | 1.57 (1.54-1.59)   | 41.9 (41.6-42.2)         | 28.3 (27.9-28.8)                     | 5.40 (5.23-5.57)       | 4.66 (4.42-4.90)   |
| 70-79        | 5.86 (5.75-5.98)          | 1.60 (1.56-1.65)   | 43.4 (42.9-43.8)         | 27.1 (26.4-27.7)                     | 5.90 (5.66-6.14)       | 3.81 (3.49-4.13)   |
| 80+          | 5.56 (5.29-5.84)          | 1.61 (1.51-1.70)   | 44.5 (43.6-45.4)         | 25.6 (23.9-27.2)                     | 7.14 (6.47-7.80)       | 2.72 (2.09-3.48)   |

789  
790  
791  
792  
793  
794  
795  
796  
797  
798  
799  
800  
801  
802

803 **Supplementary table 4:** Absolute macronutrient intakes by sex and 10-year age group. The Tromsø Study 2015-16.

|              | <b>N*</b>   | <b>Protein, g/d</b> | <b>Fat, g/d</b>  | <b>Saturated fat, g/d</b> | <b>Trans-fat, g/d</b> | <b>Monounsaturated fat, g/d</b> |
|--------------|-------------|---------------------|------------------|---------------------------|-----------------------|---------------------------------|
| <b>Total</b> | 11,425      | 99.9 (99.3-100)     | 91.4 (90.7-92.0) | 33.3 (33.0-33.5)          | 0.81 (0.80 -0.82)     | 33.9 (33.7 – 34.2)              |
| <b>Women</b> | 53.4 (6104) | 92.9 (92.1–93.6)    | 84.6 (83.8-85.4) | 30.8 (30.5-31.1)          | 0.78 (0.77-0.79)      | 31.6 (31.2-31.9)                |
| 40-49        | 30.0 (1833) | 94.9 (93.5-96.3)    | 90.4 (88.9-91.9) | 33.1 (32.5-33.7)          | 0.81 (0.79-0.83)      | 34.1 (33.5-34.7)                |
| 50-59        | 29.7 (1813) | 94.8 (93.4-96.2)    | 85.2 (83.7-86.7) | 30.4 (29.8-31.0)          | 0.78 (0.76-0.80)      | 32.1 (31.5-32.7)                |
| 60-69        | 27.0 (1646) | 91.4 (90.0-92.8)    | 81.6 (80.0-83.1) | 29.4 (28.8-30.0)          | 0.75 (0.73-0.76)      | 30.3 (29.7-30.9)                |
| 70-79        | 11.1 (679)  | 87.8 (85.5-90.0)    | 76.5 (74.3-78.8) | 29.2 (28.2-30.1)          | 0.75 (0.72-0.78)      | 27.2 (26.4-28.1)                |
| 80+          | 2.2 (133)   | 82.6 (77.0-88.1)    | 74.8 (69.2-80.5) | 29.6 (27.2-31.9)          | 0.78 (0.70-0.85)      | 26.0 (23.9-28.0)                |
| <b>Men</b>   | 46.6 (5321) | 108 (107-108)       | 99.1 (98.1-100)  | 36.1 (35.7-36.5)          | 0.85 (0.84 - 0.87)    | 36.6 (36.2-37.0)                |
| 40-49        | 26.9 (1433) | 112 (111-114)       | 108 (106-110)    | 39.6 (38.9-40.4)          | 0.94 (0.92-0.96)      | 40.4 (39.7-41.2)                |
| 50-59        | 27.5 (1464) | 112 (110-113)       | 106 (104-107)    | 36.9 (36.2-37.6)          | 0.87 (0.84-0.89)      | 38.5 (37.8-39.3)                |
| 60-69        | 28.6 (1521) | 106 (104-107)       | 94.4 (92.6-96.1) | 34.1 (33.4-34.7)          | 0.80 (0.78-0.83)      | 36 (35.2-36.7)                  |
| 70-79        | 14.4 (768)  | 98.6 (96.5-101)     | 86.7 (84.4-89.0) | 32.5 (31.5-33.5)          | 0.77 (0.74-0.80)      | 31.0 (30.1-31.8)                |
| 80+          | 2.54 (135)  | 94.5 (89.5-99.4)    | 85.5 (80.7-90.4) | 33.9 (31.8-36.0)          | 0.86 (0.78-0.93)      | 29.7 (27.9-31.5)                |

\* Total is presented as number, sex- and age-specific numbers are presented as percentage (number).

804  
805  
806  
807  
808  
809  
810  
811  
812  
813  
814  
815  
816  
817  
818

819 **Cont. supplementary table 4:** Absolute macronutrient intakes by sex and 10-year age group. The Tromsø Study 2015-16.

|              | Polyunsaturated fat, g/d | Omega 3, g/d     | Carbohydrates, g/d | Sugar, g/d       | Alcohol, g/d     | 820        |
|--------------|--------------------------|------------------|--------------------|------------------|------------------|------------|
| <b>Total</b> | 16.0 (15.9 - 16.1)       | 3.89 (3.85-3.92) | 241 (239-242)      | 32.9 (32.4-33.4) | 11.0 (10.8-11.3) | <b>821</b> |
|              |                          |                  |                    |                  |                  | <b>822</b> |
| <b>Women</b> | 14.6 (14.4-14.7)         | 3.56 (3.52-3.60) | 220 (217-221)      | 29.6 (29.0-30.2) | 8.36 (8.12-8.60) | <b>823</b> |
| 40-49        | 15.3 (15.0-15.6)         | 3.40 (3.32-3.47) | 232 (229-236)      | 33.5 (32.3-34.7) | 7.54 (7.13-7.95) | <b>824</b> |
| 50-59        | 14.9 (14.6-15.2)         | 3.61 (3.54-3.69) | 219 (216-223)      | 28.5 (27.3-29.7) | 9.37 (8.89-9.84) | <b>825</b> |
| 60-69        | 14.4 (14.0-14.7)         | 3.65 (3.57-3.73) | 209 (206-212)      | 26.8 (25.8-27.8) | 9.13 (8.63-9.64) | <b>826</b> |
| 70-79        | 12.9 (12.5-13.3)         | 3.61 (3.48-3.73) | 212 (207-218)      | 28.6 (27.0-30.3) | 6.76 (6.15-7.37) | <b>827</b> |
| 80+          | 12.3 (11.3-13.3)         | 3.64 (3.33-3.95) | 215 (203-227)      | 30.0 (26.4-33.1) | 4.50 (3.37-5.63) | <b>828</b> |
|              |                          |                  |                    |                  |                  | <b>829</b> |
| <b>Men</b>   | 17.6 (17.4-17.8)         | 4.27 (4.21-4.32) | 265 (263-267)      | 36.6 (35.9-37.4) | 14.1 (13.7-14.5) | <b>830</b> |
| 40-49        | 18.9 (18.5-19.3)         | 4.22 (4.12-4.31) | 286 (282-291)      | 41.5 (39.8-43.1) | 12.5 (11.7-13.3) | <b>831</b> |
| 50-59        | 18.4 (18.0-18.8)         | 4.33 (4.23-4.43) | 270 (266-274)      | 36.0 (34.5-37.4) | 15.1 (14.3-15.9) | <b>832</b> |
| 60-69        | 17.2 (16.8-17.5)         | 4.33 (4.23-4.42) | 253 (249-257)      | 33.5 (32.3-34.8) | 16.0 (15.2-16.8) | <b>833</b> |
| 70-79        | 15.3 (14.9-15.8)         | 4.15 (4.02-4.28) | 245 (239-250)      | 34.4 (32.7-36.2) | 12.2 (11.2-13.2) | <b>834</b> |
| 80+          | 14.2 (13.2-15.2)         | 4.09 (3.79-4.38) | 246 (233-259)      | 40.6 (35.9-45.2) | 8.51 (6.53-10.5) | <b>835</b> |

834  
835  
836  
837  
838  
839  
840  
841  
842  
843  
844  
845  
846  
847  
848

849 **Supplementary table 5: Absolute micronutrient intakes by sex in 10-year age group. The Tromsø Study 2015-16.**

|               | N*          | Vitamin A, RE/d  | Vitamin D, µg /d | Vitamin E, α-TE/d | Vitamin B6, mg/d | Vitamin B12, µg/d | Vitamin C, mg/d | Thiamin, mg/d    |
|---------------|-------------|------------------|------------------|-------------------|------------------|-------------------|-----------------|------------------|
| <b>AR</b>     |             | M:600<br>W:500   | 7.5              | M:6<br>W:5        | M:1.3<br>W:1.0   | 1.4               | M:60<br>W:50    | M:1.2<br>W:0.9   |
| <b>RI</b>     |             | M:900, W: 700    | 10               | M:10, W: 8        | M: 1.5, W: 1.2   | 2.0               | 75              | M:1.3, W:1.1     |
| <b>Total*</b> | 11,425      | 1575 (1559–1592) | 14.3 (14.2-14.5) | 21.2 (21.0-21.4)  | 2.26 (2.23-2.28) | 8.53 (8.46-8.60)  | 156 (154-157)   | 2.13 (2.12-2.15) |
| <b>Women</b>  | 53.4 (6104) | 1539 (1517-1560) | 14.0 (13.8-14.3) | 21.0 (20.7-21.3)  | 2.31 (2.27-2.34) | 7.85 (7.76-7.93)  | 169 (167-172)   | 2.14 (2.11-2.17) |
| 40-49         | 30.0 (1833) | 1606 (1563-1648) | 12.7 (12.3-13.2) | 20.7 (20.2-21.1)  | 2.30 (2.24-2.36) | 7.69 (7.54-7.84)  | 160 (156-166)   | 2.13 (2.08-2.18) |
| 50-59         | 29.7 (1813) | 1525 (1487-1564) | 14.0 (13.6-14.5) | 21.3 (20.8-21.8)  | 2.33 (2.27-2.40) | 7.87 (7.71-8.03)  | 174 (169-179)   | 2.16 (2.11-2.21) |
| 60-69         | 27.0 (1646) | 1492 (1455-1530) | 14.7 (14.2-15.2) | 21.3 (20.7-21.8)  | 2.27 (2.21-2.34) | 7.87 (7.70-8.03)  | 172 (167-176)   | 2.13 (2.07-2.18) |
| 70-79         | 11.1 (679)  | 1501 (1436-1566) | 15.5 (14.7-16.3) | 20.5 (19.6-21.3)  | 2.32 (2.21-2.43) | 8.13 (7.85-8.40)  | 176 (168-184)   | 2.16 (2.07-3.16) |
| 80+           | 2.2 (133)   | 1570 (1445-1695) | 16.7 (14.9-18.5) | 21.4 (19.4-23.3)  | 2.38 (2.15-2.62) | 8.02 (7.36-8.68)  | 168 (151-184)   | 2.18 (2.00-2.37) |
| <b>Men</b>    | 46.6 (5321) | 1617 (1592-1642) | 14.7 (14.4-14.9) | 21.4 (21.1-21.7)  | 2.20 (2.17-2.22) | 9.31 (9.21-9.41)  | 140 (138-142)   | 2.13 (2.10-2.15) |
| 40-49         | 26.9 (1433) | 1744 (1690-1799) | 13.7 (13.2-14.2) | 21.7 (21.1-22.2)  | 2.27 (2.22-2.32) | 9.36 (9.17-9.56)  | 135 (131-139)   | 2.20 (2.15-2.25) |
| 50-59         | 27.5 (1464) | 1612 (1563-1660) | 14.1 (13.6-14.6) | 21.5 (20.9-22.1)  | 2.14 (2.09-2.18) | 9.38 (9.19-9.57)  | 139 (135-143)   | 2.14 (2.09-2.18) |
| 60-69         | 28.6 (1521) | 1564 (1521-1606) | 15.3 (14.8-15.8) | 21.6 (21.0-22.2)  | 2.17 (2.11-2.22) | 9.31 (9.12-9.50)  | 143 (138-147)   | 2.10 (2.05-2.14) |
| 70-79         | 14.4 (768)  | 1501 (1445-1558) | 15.8 (15.1-16.5) | 20.6 (19.8-21.4)  | 2.12 (2.04-2.20) | 9.16 (8.89-9.43)  | 143 (137-149)   | 2.06 (1.99-2.13) |
| 80+           | 2.54 (135)  | 1590 (1465-1715) | 17.5 (15.7-19.3) | 21.4 (19.5-23.4)  | 1.91 (1.74-2.08) | 8.90 (8.35-9.45)  | 142 (127-156)   | 1.94 (1.80-2.08) |

850 \* Total is presented as numbers, sex- and age-specific numbers are presented as percentage (number)

851 \* Numbers are given as mg or µg per day with 95% confidence intervals.

852 \* M: men; W: women; AR: Average requirements as they are provided by the Nordic Nutrition Recommendations 2012; RI: Recommended intakes as they are provided by the  
853 Nordic Nutrition Recommendations 2012.

854

855

856

857

858

859

860

861

862

863

864

865

866 **Cont. Supplementary table 5:** Absolute micronutrient intakes by sex and 10-year age groups. The Tromsø Study 2015-16.

|              | <b>Riboflavin, mg/d</b> | <b>Niacin, NE/d</b> | <b>Folate, µg /d</b>          | <b>Calcium, mg/d</b> | <b>Phosphorus, mg/d</b> | <b>Potassium, mg/d</b> | <b>Magnesium, mg/d</b> |
|--------------|-------------------------|---------------------|-------------------------------|----------------------|-------------------------|------------------------|------------------------|
| <b>AR</b>    | M: 1.4<br>W: 1.1        | M:15<br>W:12        | 200                           | 500                  | 450                     | None                   | None                   |
| <b>RI</b>    | M:1.5, W:1.2            | M:18, W:14          | M:300, W:400/300 <sup>1</sup> | 800                  | 600                     | M:3.5, W:3.1 (g/d)     | M:350, W:280           |
| <b>Total</b> | 2.98 (2.96-3.01)        | 28.0 (27.7 - 28.2)  | 360 (357-363)                 | 1155 (1146-1165)     | 1923 (1911-1935)        | 5109 (5076-5141)       | 431 (428-434)          |
| <b>Women</b> | 2.93 (2.89-2.97)        | 27.4 (27.0-27.7)    | 365 (361-369)                 | 1095 (1082-1109)     | 1808 (1793-1823)        | 4864 (4821-4907)       | 411 (408-414)          |
| 40-49        | 2.85 (2.77-2.92)        | 27.3 (26.6-27.9)    | 368 (360-375)                 | 1120 (1097-1143)     | 1843 (1815-1870)        | 4662 (4589-4736)       | 416 (410-422)          |
| 50-59        | 2.94 (2.86-3.01)        | 28.0 (27.4-28.7)    | 373 (365-380)                 | 1095 (1071-1119)     | 1842 (1814-1871)        | 4986 (4904-5068)       | 423 (417-430)          |
| 60-69        | 2.96 (2.88-3.04)        | 27.1 (26.4-27.7)    | 358 (350-366)                 | 1075 (1050-1100)     | 1779 (1750-1808)        | 5001 (4917-5085)       | 407 (400-413)          |
| 70-79        | 3.04 (2.91-2.16)        | 26.8 (25.7-27.8)    | 355 (343-367)                 | 1079 (1036-1121)     | 1722 (1675-1770)        | 4829 (4696-4962)       | 383 (373-393)          |
| 80+          | 3.08 (2.81-3.34)        | 26.1 (23.9-28.3)    | 355 (329-382)                 | 1098 (997-1199)      | 1656 (1540-1771)        | 4480 (4216-4743)       | 361 (339-383)          |
| <b>Men</b>   | 3.05 (3.01-3.08)        | 28.7 (28.4-29.0)    | 354 (350-358)                 | 1224 (1210-1239)     | 2055 (2038-2073)        | 5389 (5341-5438)       | 454 (450-458)          |
| 40-49        | 3.10 (3.02-3.17)        | 29.7 (29.0-30.3)    | 371 (364-379)                 | 1294 (1265-1323)     | 2143 (2108-2178)        | 5289 (5196-5382)       | 469 (462-477)          |
| 50-59        | 3.05 (2.98-3.12)        | 29.6 (29.0-30.2)    | 360 (353-367)                 | 1237 (1209-1264)     | 2116 (2083-2149)        | 5509 (5416-5603)       | 472 (465-480)          |
| 60-69        | 3.04 (2.96-3.11)        | 28.4 (27.8-28.9)    | 346 (339-352)                 | 1187 (1161-1214)     | 2013 (1981-2045)        | 5466 (5373-5560)       | 447 (440-454)          |
| 70-79        | 2.99 (2.89-3.09)        | 26.8 (26.0-27.6)    | 333 (323-342)                 | 1147 (1110-1185)     | 1894 (1851-1937)        | 5253 (5135-5370)       | 414 (405-423)          |
| 80+          | 2.87 (2.66-3.09)        | 23.9 (22.2-25.6)    | 322 (300-343)                 | 1197 (1102-1291)     | 1857 (1753-1961)        | 5055 (4795-5314)       | 393 (371-414)          |

\*1. The recommendation is 400 µg/day for premenopausal women.

\*2. The recommendation is 9 mg/day for postmenopausal women.

867  
868  
869  
870  
871  
872  
873  
874  
875  
876  
877  
878  
879  
880  
881



882 **Cont. Supplementary table 5:** Absolute micronutrient intakes by sex and 10-year age groups. The Tromsø Study 2015-16.

|              | Iron, mg/d               | Zinc, mg/d       | Copper, mg/d     | Selenium, µg /d  |
|--------------|--------------------------|------------------|------------------|------------------|
| <b>AR</b>    | M:7, W:10/6              | M:6, W: 5        | 0.7              | M:35, W:30       |
| <b>RI</b>    | M:9, W:15/9 <sup>2</sup> | M:9, W:7         | 0.9              | M:60, W:50       |
| <b>Total</b> | 12.4 (12.3-12.6)         | 14.4 (14.3-14.5) | 1.51 (1.49-1.52) | 68.1 (67.5-68.6) |
|              |                          |                  |                  |                  |
| <b>Women</b> | 12.4 (12.2-12.7)         | 14.0 (13.8-14.2) | 1.54 (1.52-1.57) | 64.4 (63.7-65.2) |
| 40-49        | 13.8 (13.2-14.4)         | 14.7 (14.4-15.1) | 1.60 (1.56-1.65) | 62.4 (61.0-63.8) |
| 50-59        | 12.6 (12.2-13.0)         | 14.1 (13.8-14.5) | 1.58 (1.53-1.62) | 65.7 (64.2-67.1) |
| 60-69        | 11.3 (11.0-11.7)         | 13.5 (13.1-13.8) | 1.48 (1.44-1.53) | 64.9 (63.5-66.4) |
| 70-79        | 11.2 (10.6-11.8)         | 13.4 (12.9-14.0) | 1.44 (1.37-1.52) | 65.9 (63.5-68.2) |
| 80+          | 11.2 (9.44-12.9)         | 13.0 (11.7-14.3) | 1.38 (1.23-1.53) | 62.0 (56.9-67.2) |
|              |                          |                  |                  |                  |
| <b>Men</b>   | 12.4 (12.2-12.6)         | 14.9 (14.7-15.0) | 1.47 (1.45-1.49) | 72.2 (71.4-73.0) |
| 40-49        | 13.1 (12.8-13.4)         | 16.1 (15.7-16.4) | 1.55 (1.51-1.60) | 71.0 (69.5-72.5) |
| 50-59        | 12.9 (12.5-13.3)         | 15.1 (14.8-15.4) | 1.49 (1.46-1.53) | 73.2 (71.7-74.6) |
| 60-69        | 12.1 (11.8-12.5)         | 14.3 (14.0-14.6) | 1.43 (1.39-1.47) | 73.2 (71.7-74.6) |
| 70-79        | 11.3 (10.8-11.8)         | 13.6 (13.1-14.1) | 1.37 (1.31-1.43) | 71.8 (69.7-73.9) |
| 80+          | 9.91 (9.23-10.6)         | 12.6 (11.7-13.5) | 1.23 (1.12-1.34) | 66.0 (61.6-70.4) |

883  
884  
885  
886  
887  
888  
889  
890  
891  
892  
893  
894  
895  
896  
897

898 **Supplementary table 6:** Micronutrient intakes presented in mg/ $\mu$ g per 10 MJ by sex and 10-year age group. The Tromsø Study 2015-16.

|              | N*          | Vitamin A, RE/10 MJ | Vitamin D, $\mu$ g/10 MJ | Vitamin E, $\alpha$ -TE/10 MJ | Vitamin B6, mg/d10 MJ | Vitamin B12, $\mu$ g/10 MJ | Vitamin C, mg/10 MJ |
|--------------|-------------|---------------------|--------------------------|-------------------------------|-----------------------|----------------------------|---------------------|
| <b>Total</b> | 11,425      | 1645 (1630-1660)    | 15.3 (15.1-15.5)         | 22.2 (22.0-22.4)              | 2.40 (2.37-2.42)      | 8.82 (8.77-8.87)           | 166 (164-168)       |
| <b>Women</b> | 53.4 (6104) | 1749 (1727-1770)    | 16.2 (15.9-16.5)         | 23.9 (23.6-24.2)              | 2.66 (2.62-2.70)      | 8.83 (8.77-8.90)           | 195 (192-197)       |
| 40-49        | 30.0 (1833) | 1741 (1697-1785)    | 14.0 (13.5-14.5)         | 22.4 (21.9-22.9)              | 2.55 (2.47-2.63)      | 8.26 (8.14-8.38)           | 177 (173-182)       |
| 50-59        | 29.7 (1813) | 1720 (1682-1758)    | 16.0 (15.5-16.6)         | 24.0 (23.4-24.5)              | 2.65 (2.58-2.72)      | 8.75 (8.63-8.87)           | 196 (192-201)       |
| 60-69        | 27.0 (1646) | 1752 (1713-1791)    | 17.4 (16.8-18.0)         | 24.8 (24.2-25.4)              | 2.69 (2.61-2.77)      | 9.13 (9.00-9.26)           | 204 (198-209)       |
| 70-79        | 11.1 (679)  | 1799 (1740-1858)    | 19.0 (18.0-19.9)         | 24.7 (23.8-25.6)              | 2.85 (2.72-2.99)      | 9.71 (9.50-9.92)           | 212 (204-221)       |
| 80+          | 2.2 (133)   | 1957 (1834-2079)    | 21.2 (18.9-23.5)         | 26.7 (24.5-28.9)              | 3.00 (2.69-3.30)      | 9.65 (9.22-10.1)           | 210 (192-227)       |
| <b>Men</b>   | 46.6 (5321) | 1526 (1506-1546)    | 14.2 (13.9-14.4)         | 20.3 (20.1-20.6)              | 2.10 (2.07-2.12)      | 8.81 (8.74-8.88)           | 134 (132-136)       |
| 40-49        | 26.9 (1433) | 1531 (1489-1573)    | 12.2 (11.7-12.6)         | 19.1 (18.7-19.5)              | 2.03 (1.98-2.07)      | 8.26 (8.14-8.39)           | 121 (117-124)       |
| 50-59        | 27.5 (1464) | 1471 (1434-1508)    | 13.1 (12.7-13.6)         | 19.7 (19.3-20.2)              | 2.05 (2.02-2.09)      | 8.60 (8.47-8.73)           | 129 (125-132)       |
| 60-69        | 28.6 (1521) | 1540 (1502-1577)    | 15.3 (14.8-15.8)         | 21.3 (20.7-21.8)              | 2.14 (2.09-2.20)      | 9.10 (8.96-9.23)           | 141 (137-145)       |
| 70-79        | 14.4 (768)  | 1566 (1515-1617)    | 16.7 (15.9-17.4)         | 21.6 (20.8-22.3)              | 2.23 (2.16-2.31)      | 9.55 (9.35-9.75)           | 150 (145-156)       |
| 80+          | 2.54 (135)  | 1685 (1578-1792)    | 18.9 (16.9-20.8)         | 22.8 (20.9-24.8)              | 2.05 (1.87-2.22)      | 9.46 (9.10-9.82)           | 150 (136-165)       |

\* Total is presented as numbers, sex- and age-specific numbers are presented as percentage (number)

\*Numbers are given as mg or  $\mu$ g per day with 95% confidence intervals

899  
900  
901  
902  
903  
904  
905  
906  
907  
908  
909  
910  
911  
912  
913  
914  
915  
916  
917  
918

919 **Cont. supplementary table 6:** Micronutrient intake presented in mg/ $\mu$ g per 10 MJ by sex and 10-year age group. The Tromsø Study 2015-16.

|              | Thiamin, mg/10 MJ | Riboflavin, mg/10 MJ | Niacin, NE/10 MJ | Folate, $\mu$ g /10 MJ | Calcium, mg/10 MJ | Phosphorus, mg/10 MJ | Potassium, mg/10 MJ | Magnesium, mg/10 MJ |
|--------------|-------------------|----------------------|------------------|------------------------|-------------------|----------------------|---------------------|---------------------|
| <b>Total</b> | 2.26 (2.24-2.28)  | 3.14 (3.11-3.17)     | 29.7 (29.4-29.9) | 379 (376-382)          | 1186 (1179-1193)  | 1990 (1984-1995)     | 5355 (5330-5379)    | 448 (447-449)       |
| <b>Women</b> | 2.47 (2.43-2.50)  | 3.35 (3.31-3.40)     | 31.6 (31.2-32.0) | 417 (413-421)          | 1217 (1208-1227)  | 2033 (2025-2041)     | 5537 (5504-5571)    | 464 (462-466)       |
| 40-49        | 2.35 (2.29-2.42)  | 3.12 (3.04-3.21)     | 30.2 (29.4-31.0) | 403 (395-411)          | 1192 (1174-1210)  | 1976 (1962-1990)     | 5053 (4996-5109)    | 449 (446-453)       |
| 50-59        | 2.45 (2.40-2.51)  | 3.32 (3.24-3.39)     | 31.9 (31.2-32.5) | 419 (413-426)          | 1205 (1188-1222)  | 2051 (2037-2065)     | 5604 (5543-5665)    | 473 (470-476)       |
| 60-69        | 2.52 (2.46-2.58)  | 3.47 (3.39-3.56)     | 32.8 (31.5-32.9) | 421 (413-429)          | 1231 (1212-1249)  | 2066 (2051-2080)     | 5875 (5807-5943)    | 474 (470-478)       |
| 70-79        | 2.65 (2.54-2.75)  | 3.69 (3.55-3.83)     | 33.0 (31.8-34.3) | 431 (419-444)          | 1270 (1240-1299)  | 2063 (2041-2085)     | 5848 (5752-5944)    | 462 (456-468)       |
| 80+          | 2.74 (2.51-2.97)  | 3.81 (3.51-4.11)     | 33.0 (30.1-35.8) | 442 (415-470)          | 1300 (1235-1364)  | 2007 (1954-2060)     | 5546 (5374-5718)    | 444 (432-456)       |
| <b>Men</b>   | 2.03 (2.01-2.05)  | 2.90 (2.87-2.94)     | 27.5 (27.2-27.7) | 336 (333-339)          | 1149 (1139-1160)  | 1940 (1932-1949)     | 5145 (5110-5180)    | 430 (428-431)       |
| 40-49        | 1.95 (1.92-1.99)  | 2.75 (2.69-2.81)     | 26.5 (26.0-26.9) | 329 (324-334)          | 1136 (1118-1155)  | 1891 (1876-1905)     | 4702 (4643-4760)    | 415 (412-419)       |
| 50-59        | 1.97 (1.94-2.00)  | 2.82 (2.76-2.87)     | 27.4 (26.9-27.8) | 331 (327-336)          | 1131 (1111-1151)  | 1942 (1925-1958)     | 5102 (5036-5169)    | 434 (430-437)       |
| 60-69        | 2.08 (2.03-2.12)  | 3.00 (2.93-3.07)     | 28.2 (27.6-28.7) | 340 (335-346)          | 1151 (1132-1170)  | 1965 (1949-1981)     | 5381 (5313-5449)    | 438 (434-441)       |
| 70-79        | 2.17 (2.11-2.23)  | 3.13 (3.04-3.22)     | 28.4 (27.7-29.2) | 349 (341-356)          | 1185 (1157-1212)  | 1976 (1954-1998)     | 5539 (5452-5626)    | 434 (429-439)       |
| 80+          | 2.08 (1.95-2.21)  | 3.09 (2.89-3.29)     | 25.8 (24.1-27.4) | 342 (325-359)          | 1263 (1195-1331)  | 1971 (1923-2020)     | 5417 (5259-5575)    | 417 (407-427)       |

920  
 921  
 922  
 923  
 924  
 925  
 926  
 927  
 928  
 929  
 930  
 931  
 932  
 933  
 934  
 935

936 **Cont. Supplementary table 6:** Micronutrient intake presented in mg/ $\mu$ g per 10 MJ by sex and 10-year age group. The Tromsø Study 2015-16.

|              | Iron, mg/10 MJ   | Zinc, mg/10 MJ   | Copper, mg/10 MJ | Selenium, $\mu$ g/10 MJ |
|--------------|------------------|------------------|------------------|-------------------------|
| <b>Total</b> | 13.1 (12.9-13.3) | 15.1 (15.0-15.3) | 1.59 (1.57-1.61) | 71.5 (71.0-72.0)        |
| <b>Women</b> | 14.2 (14.0-14.6) | 16.0 (15.8-16.3) | 1.77 (1.74-1.80) | 73.7 (72.9-74.6)        |
| 40-49        | 15.1 (14.4-15.9) | 16.2 (15.8-16.7) | 1.77 (1.71-1.83) | 68.3 (66.6-69.9)        |
| 50-59        | 14.3 (13.8-14.8) | 15.9 (15.5-16.3) | 1.78 (1.73-1.83) | 73.9 (72.5-75.3)        |
| 60-69        | 13.4 (13.0-13.8) | 15.8 (15.4-16.2) | 1.75 (1.70-1.81) | 76.7 (75.1-78.2)        |
| 70-79        | 13.7 (12.9-14.4) | 16.4 (15.7-17.1) | 1.76 (1.67-1.85) | 80.4 (77.8-82.9)        |
| 80+          | 14.3 (11.7-16.9) | 16.1 (14.5-17.7) | 1.74 (1.53-1.96) | 77.1 (71.4-82.8)        |
| <b>Men</b>   | 11.8 (11.7-12.0) | 14.1 (13.9-14.2) | 1.39 (1.37-1.41) | 68.9 (68.3-69.6)        |
| 40-49        | 11.6 (11.3-11.9) | 14.3 (14.0-14.5) | 1.38 (1.35-1.42) | 63.2 (62.0-64.3)        |
| 50-59        | 12.0 (11.6-12.3) | 13.9 (13.7-14.1) | 1.38 (1.35-1.41) | 67.5 (66.5-68.5)        |
| 60-69        | 12.0 (11.6-12.4) | 14.0 (13.7-14.3) | 1.41 (1.37-1.44) | 72.3 (71.0-73.5)        |
| 70-79        | 11.9 (11.4-12.4) | 14.2 (13.8-14.7) | 1.44 (1.38-1.49) | 75.7 (73.9-77.5)        |
| 80+          | 10.5 (9.98-11.1) | 13.4 (12.7-14.2) | 1.30 (1.20-1.40) | 70.1 (66.8-73.5)        |

950  
951  
952  
953  
954  
955  
956  
957  
958  
959  
960  
961  
962  
963  
964  
965

966  
967  
968

### Supplementary figure 1:

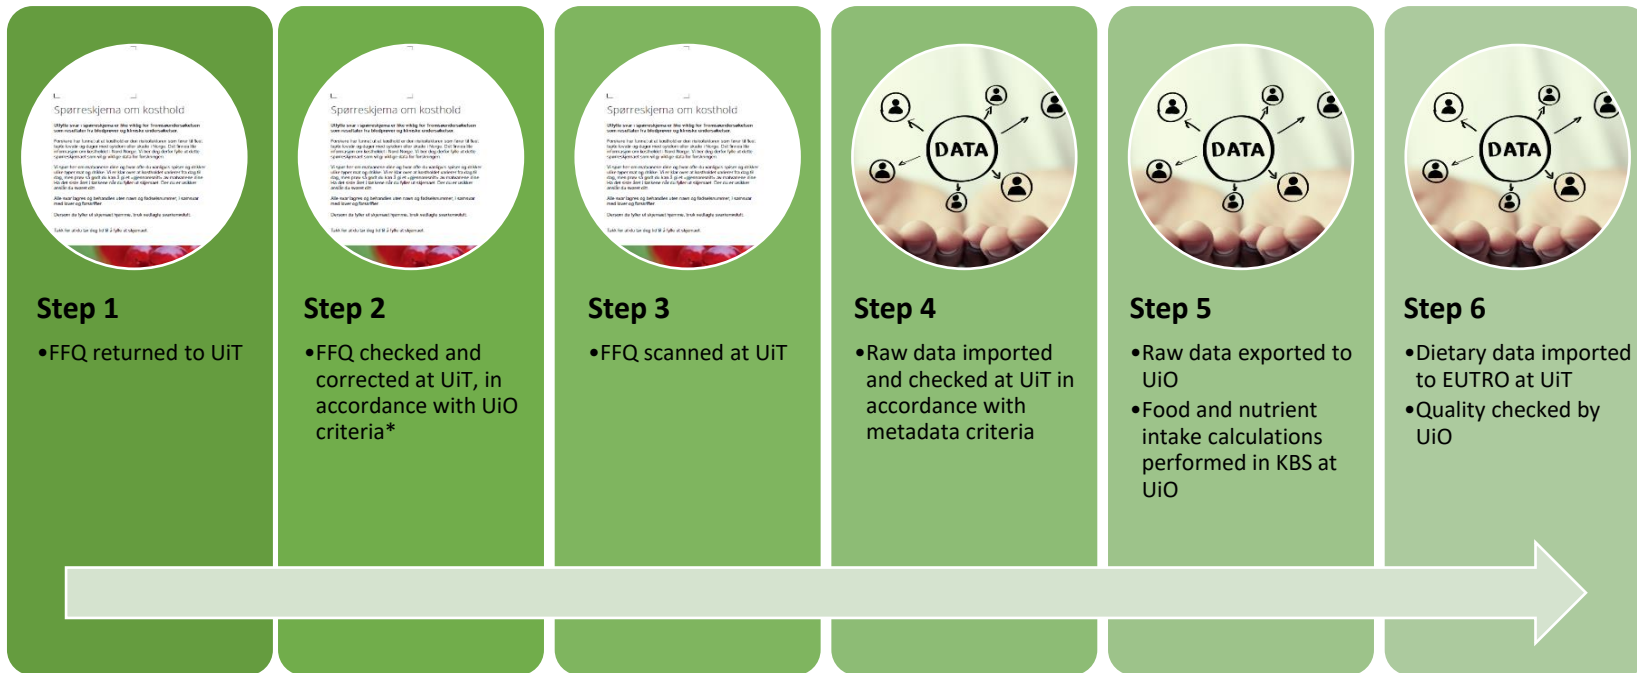

969  
970  
971  
972  
973  
974  
975  
976  
977  
978  
979

### Correction guidelines (food frequency questionnaire) from the University of Oslo:

- If two frequency fields were marked, one clearly marked and one scribbled out, choose the one clearly marked.
- If two frequency fields were marked, and both are clearly marked, do the following:
  - If the two marked fields are adjacent, choose the one with the lowest value
  - If one of the two marked fields was “seldom/never” or zero, and there were no marks on “amount”, choose seldom/never
  - If one of the two marked fields was “seldom/never” or zero, and there was a mark on “amount”, choose the marked field with a frequency value other than “seldom/never” or zero.
- Be sure to check specifically that unclear and skewed markings were scanned and registered properly.
- Information from the open field questions was manually included in the database.
